1 **Relationship between salmon egg subsidy and the distribution of an avian predator**

2

3 Taihei Yamada<sup>1,\*</sup>, Hiroataka Katahira<sup>2</sup>, Kazuki Miura<sup>3,a</sup>, Futoshi Nakamura<sup>1</sup>

4

5 <sup>1</sup>Graduate School of Agriculture, Hokkaido University, N9W9, Sapporo, Hokkaido 060-8589,

6 Japan

7 <sup>2</sup>Department of Environmental Science, School of Life and Environmental Science, Azabu

8 University, 1-17-71 Fuchinobe, Chuo-ku, Sagami-hara, Kanagawa 252-5201, Japan

9 <sup>3</sup>Shiretoko Museum, Honmachi 49, Shari-gun, Shari, Hokkaido, 099-4113, Japan

10

11 <sup>a</sup>**Present address:** Research Institute of Energy, Environment, and Geology, Hokkaido Research

12 Organization, N19W12, Sapporo, Hokkaido 060-0819, Japan

13

14 **\*Corresponding author:** Taihei Yamada; E-mail, [thymd8@gmail.com](mailto:thymd8@gmail.com); TEL, +818039994855

15 Graduate School of Agriculture, Hokkaido University, N9W9, Sapporo, Hokkaido 060-8589,

16 Japan

17

18 **Key Words:** resource subsidy; marine-derived nutrients; behavioural ecology; stream ecology;

19 Salmonidae; Pacific salmon.

20 **ABSTRACT**

21 As a spatial subsidy, which is the phenomenon of transferring resources from a donor system to a  
22 recipient system, anadromous salmonids contribute to the supply of marine-derived nutrients to  
23 freshwater and terrestrial systems. Live salmon and salmon carcasses and eggs are utilized by  
24 various organisms and affect their abundance and distribution. However, the evaluation of the  
25 effect of salmon subsidies on the abundance and distribution of terrestrial animals is biased  
26 towards predators or scavengers that utilize spawning adults and carcasses, and few studies have  
27 focused on the effect of salmon eggs as a subsidy. To avoid underestimating the function of  
28 salmon subsidies, the response to the availability of salmon eggs in various systems should be  
29 investigated. Here, we investigated the abundance and feeding behaviour of the brown dipper  
30 *Cinclus pallasii*, as salmon egg a consumer, based on the hypothesis that the availability of  
31 salmon eggs affects the diet composition and stream distribution of this small predator. In  
32 addition, to test whether changes in the abundance of brown dippers are determined by salmon  
33 spawning, their abundance was compared upstream and downstream of the dam. Brown dippers  
34 used salmon eggs during the spawning season (53.7% of diet composition), and their abundance  
35 increased as the number of spawning redds increased. In contrast, this pattern was not observed  
36 upstream of the dam. These results suggested that the abundance and stream distribution of  
37 brown dippers vary according to the variation in the spatiotemporal availability of salmon eggs.

## 38 **1. INTRODUCTION**

39 Spatial subsidies are a phenomenon in which resources are transferred from a donor system to a  
40 recipient system (Polis et al., 1997). Spatial subsidies play a crucial role in biological  
41 communities because they affect the abundance and distribution patterns of organisms and the  
42 food web structure in the recipient systems by affecting the availability of basal resources  
43 (Hocking et al., 2013; Kawaguchi et al., 2003; Nakano & Murakami, 2001; Spiller et al., 2010;  
44 Terui et al., 2018).

45 Anadromous salmonids, well-known spatial subsidy representatives, transport marine-  
46 derived nutrients and energy to freshwater and terrestrial ecosystems through their migrations  
47 (Gende et al., 2002; Hocking & Reynolds, 2011; Koshino et al., 2013; Schindler et al., 2003).  
48 Salmon subsidies contribute to increasing aquatic invertebrate biomass and freshwater fish  
49 abundance in rivers (Denton et al., 2009; Wipfli et al., 1998, 1999). Spawning adults and  
50 carcasses are also used as food by terrestrial animals not only in the underwater ecosystem but  
51 also in surrounding riparian ecosystems and eventually affect the abundance and distribution of  
52 terrestrial scavengers and top predators (Boulanger et al., 2004; Christie & Reimchen, 2005;  
53 Field & Reynolds, 2013; Levi et al., 2012; Walters et al., 2021). Salmon subsidies thus provide  
54 insights into how multiple ecosystems are tangled together.

55 Past investigations on the effects of salmon subsidies on terrestrial organism abundance  
56 and distribution have thus far been biased towards predators or scavengers that utilize spawning  
57 adults and carcasses (e.g., Boulanger et al., 2004; Christie & Reimchen, 2005; Field & Reynolds,  
58 2013; Levi et al., 2012; Walters et al., 2021). Considering that terrestrial organisms are provided  
59 multiple resources by salmon runs, such as eggs and fry, as well as spawning adults and  
60 carcasses (Munro, 1941; Willson & Halupka, 1995), salmon subsidies may have even more  
61 unexpected far-reaching effects. Therefore, a comprehensive understanding of the effect of

62 subsidies on the population and distribution of organisms is important. However, few studies  
63 have focused on the effect of salmon eggs as a subsidy on the abundance and distribution of  
64 terrestrial animals. It is necessary to clarify the response to the availability of salmon eggs in  
65 various systems to avoid underestimating the function of salmon subsidies.

66         Dippers (Aves: Cinclidae) are riparian birds that mainly feed on aquatic invertebrates by  
67 diving into the water (Eguchi, 1990; Taylor & O'Halloran, 1997, 2001) and which are known to  
68 use salmon eggs in available rivers and seasons (Goodge, 1959; Obermeyer et al., 1999, 2006;  
69 Reimchen, 2017; Whitehorne, 2010). For example, the American dipper *Cinclus mexicanus* can  
70 achieve higher reproductive success (as measured by fecundity and juvenile growth) in reaches  
71 where *Oncorhynchus* swim upstream than in reaches where it does not (Obermeyer et al., 2006;  
72 Tonra et al., 2016). The population size of the white-throated dipper *C. cinclus* in Norway may  
73 also benefit from eating salmon fry because it was correlated with the annual density of salmon  
74 fry (Nilsson et al., 2018). Because dippers, which are not scavengers, are not affected by the  
75 amount of carcasses – in addition to their well-studied relationship with salmon, as noted above –  
76 they are a suitable model species for examining the effect of salmon egg subsidies on the  
77 abundance and distribution of terrestrial animals. The brown dipper *C. pallasii* (Figure 1), which  
78 is distributed in Asia (Hong et al., 2019), preys on salmon eggs and juvenile salmon (Murata,  
79 1900). However, its actual status has never been evaluated quantitatively, and the relationship  
80 with salmon subsidies has long been overlooked.

81         We therefore investigated the abundance and diet composition of the brown dipper in  
82 the Shiretoko Peninsula of Hokkaido, northern Japan, where the spawning migrations of salmon  
83 are well observed, based on the hypothesis that the availability of salmon subsidies drives the  
84 diet composition and stream distribution of this small predator. In addition, by comparing the  
85 abundance of brown dippers above and below dams where salmon cannot run upstream during

86 peak salmon spawning runs, we tested whether changes in the abundance of brown dippers are  
87 determined by salmon spawning. More specifically, it was predicted that salmon spawning would  
88 cause a shift in the diet of brown dippers to salmon eggs and an increase in the abundance of  
89 brown dippers by altering the distribution of food resources, while no such pattern occurs  
90 upstream of the dam.

91

92

## 93 **2. MATERIALS AND METHODS**

### 94 **2-1. Study site**

95 Four streams located in the Shiretoko Peninsula were selected for the present survey (Figure 2).  
96 Natural spawning sustains pink salmon *Oncorhynchus gorbuscha* and chum salmon *O. keta*  
97 populations in these streams, and the former is dominant (T. Yamada, unpublished data). The  
98 release of juvenile chum salmon has been conducted only in the Mosekarubetsu stream, and in-  
99 stream harvesting does not occur in all streams. The central part of the Shiretoko Peninsula has  
100 been designated as a World Natural Heritage site since 2005, partially because of the close  
101 relationships between the marine and terrestrial ecosystems sustained by the anadromous  
102 migration of pink salmon and chum salmon (IUCN, 2005). The upper reaches of the studied  
103 streams are included in the Shiretoko World Natural Heritage site. Rivers and streams in the  
104 Shiretoko Peninsula are highly fragmented by more than 330 artificial dams (Takahashi et al.,  
105 2005), which is no exception in all selected streams. Study sections were set up in each stream  
106 from the mouth of the stream to the proximal dam. The Chienbetsu stream was surveyed up to  
107 the second proximal dam because many salmon pass through the first proximal dam. The length  
108 of the study section was 289.4, 348.2, 154.9, and 211.3 m in the Chienbetsu stream, Funbe  
109 stream, Mosekarubetsu stream, and Shoji stream, respectively.

110

## 111 **2-2. Field survey**

112 Temporal changes in the abundance and diet of brown dippers were evaluated from mid-August  
113 to early November 2021, the spawning period of pink salmon. Field observations were  
114 conducted in one or two streams per day for a total effort of eight or nine days at every 9- to 11-  
115 day interval in each stream. In the observation protocol, one investigator (T. Yamada) walked  
116 along the study section from the lower to the upper reach, counting the number of brown dippers.  
117 To avoid recounting birds, the investigator checked where the flying individuals stopped and  
118 ignored individuals who flew ahead of the investigator, expecting territorial individuals to  
119 characteristically ‘double-back’ when pushed to the ends of their territory (Chiu et al., 2008).

120 The date of the count survey was the same as that of the diet survey, and the count  
121 survey was conducted before the diet survey was conducted. In the diet survey, when the  
122 investigator found an individual, they approached it at an observable distance and recorded the  
123 diet composition and age category (adult or juvenile) using binoculars (MONARCH 10 × 42;  
124 Nikon, Tokyo, Japan) (Obermeyer et al., 1999). The age category was classified by the presence  
125 or absence of juvenal plumage. The contents of the dipper’s diet were classified into four  
126 categories: aquatic insects, terrestrial insects, algae, and salmon eggs. If no observable  
127 individuals were found, no observations were made. The diet survey was conducted only once  
128 per individual at each observation cycle; the mean ± sd observation time was  $4.29 \pm 3.16$   
129 minutes.

130 Salmon spawning redds were also visually counted on the same day as the above  
131 observation procedures to obtain an index of the availability of salmon eggs. Pink salmon exhibit  
132 “probing”, a periodic and short-term migration behaviour between the sea and multiple drainages  
133 (Morita, 2021; Thedinga et al., 2000). If many individuals exhibit probing, salmon abundance

134 cannot be a direct indicator of the number of spawners; therefore, we used the number of  
135 spawning redds as an indicator of the number of spawners. Spawning redds were visually judged  
136 as the area of disturbed gravel or bright (denuded) areas among the periphyton-covered gravel  
137 (Ortlepp & Mürle, 2003; Pedersen et al., 2009). We also measured the stream surface area of the  
138 study section only once in each section during the study period.

139 The abundance of brown dippers was also surveyed upstream of dams in the selected  
140 stream at the end of September 2021 during the peak spawning period of pink salmon, except in  
141 the Chienbetsu stream, where the dam has a fishway allowing migration to the upper reaches.  
142 Additional study sections were set up at approximately 400 m from the dam in each case. The  
143 distance between the end of the below dam section and the start of the above dam section in each  
144 stream was 1 to 2 m. An investigator walked from the dam to the upstream end of the study  
145 section counting the number of dippers, as was the case in the lower reach survey. This survey  
146 was conducted on the same day in the fifth cycle of the count survey mentioned above. We also  
147 measured the stream surface area of the study section only once in each stream.

148

### 149 **2-3. Statistical analysis**

150 The dependence on salmon eggs in brown dipper diets was evaluated by fitting a generalized  
151 linear mixed model (GLMM) to the individual diet data per. In the analysis, the dominance ratio  
152 of salmon eggs in the diet composition was used as a response variable and it was assumed to  
153 follow a binomial distribution. Age category and number of spawning redds were used as the  
154 candidate explanatory variables, considering stream ID and observation cycle ID as a nested  
155 random intercept. To avoid multicollinearity, variance inflation factors (VIFs) were calculated  
156 before the analysis; all variables had values less than 2.5, the threshold indicative of troubling  
157 collinearity for regressions (Johnston et al., 2018). Akaike's information criterion (AIC) was

158 used for model selection (Burnham & Anderson, 2002). If several plausible models had  $\Delta AIC \leq$   
159 2, the optimal model was selected according to the principle of parsimony (Burnham &  
160 Anderson, 2002).

161 A relationship between the availability of salmon eggs (represented as the number of  
162 spawning redds) and the brown dipper abundance was also estimated by fitting GLMMs to the  
163 dipper count data as a response variable assuming a Poisson distribution. The number of  
164 spawning redds and time in the day when the survey was started were used as the candidate  
165 explanatory variables, considering log-transformed stream surface area as an offset term and  
166 stream ID as a random intercept. VIF of all variables were less than 2.5. Akaike's information  
167 criterion (AIC) was used for model selection (Burnham & Anderson, 2002). If several plausible  
168 models had  $\Delta AIC \leq 2$ , the optimal model was selected according to the principle of parsimony  
169 (Burnham & Anderson, 2002).

170 Since resource availability may affect organism distribution (Dingle, 2014; e.g., Dingle  
171 & Drake, 2007), it was also expected that the dipper abundance differed between the upper and  
172 lower reaches of the dam. Brown dipper abundance in the fifth observation cycle was compared  
173 between the lower reaches and the upper reaches of the dam by fitting the count data to a GLMM  
174 considering log-transformed stream surface area as an offset term and the stream ID as a random  
175 intercept. When the 95% confidence intervals (95% CI) of the estimated coefficient values did  
176 not overlap between the study sections, we considered the differences significant.

177 All data analyses were conducted with R v. 4.2.0 (R Core Team, 2022) using lme4 v.  
178 1.1.30 (Bates et al., 2015) for GLMMs.

179

180

181 **3. RESULTS**



182 A total of 108 brown dipper individuals, 631 redds, 1257 pink salmon individuals, and 118 chum  
183 salmon individuals were observed during our survey. Feeding behaviour was monitored in 4  
184 individuals (3 adults and 1 juvenile) in the pre-spawning period and in 24 individuals (15 adults  
185 and 9 juveniles) in the spawning period from the three streams, except for the Mosekarubetsu  
186 stream, where close observation could not be made.

187 The diet composition changed between the salmon pre-spawning and spawning periods  
188 (Figure 3a). The percentage of salmon eggs in the diet was up to 53.7% (Figure 3a) during the  
189 latter period. The brown dippers basically ingested only small food in the water and did not peck  
190 salmon carcasses. As a result of model selection based on AIC, the model including the number  
191 of spawning redds as the explanatory variable was selected (Table1), indicating that the number  
192 of spawning redds had a positive effect on the salmon egg ratio in the diet (Figure 3b; Table 2).

193 The abundance survey showed that brown dipper abundance tended to be relatively high  
194 during the salmon spawning period in each stream (Figure 4). In the model selection process, the  
195 model including the number of spawning redds as the explanatory variable was selected (Table  
196 1). The brown dipper abundance positively correlated with the number of spawning redds in the  
197 selected model (Figure 5; Table 2). The comparison between abundances in the upper and lower  
198 sections of the dam showed that the abundance in the lower section was clearly higher than that  
199 in the upper section (Marginal  $R^2 = 0.792$ , Conditional  $R^2 = 0.821$ ; Figure 6; Table 2).

200

201

## 202 **4. DISCUSSION**

203 This study demonstrates for the first time that salmon eggs are the dominant dietary item for the  
204 brown dipper during the salmon spawning season and that the abundance and stream distribution  
205 of terrestrial vertebrate species can be predicted by the number of spawning redds used to

206 represent the availability of salmon eggs. In addition, brown dipper abundance during the peak  
207 spawning season differed significantly between upstream and downstream of the dam, with the  
208 downstream abundance being higher. It is therefore indicated that the distribution of brown  
209 dippers varies according to variation in the spatiotemporal availability of salmon subsidies. One  
210 of the typical theories of the spatial distribution of animal populations is the ideal free  
211 distribution, which assumes that individuals are free to move among sites (Fretwell & Lucas,  
212 1969), and our results may be explained by this theory. The reason is that brown dippers did not  
213 use the site upstream of the dam (without salmon subsidies) even when their density was high  
214 downstream of the dam.

215 While salmon eggs serve as an important food source for brown dippers, the salmon  
216 spawning behaviour of digging up the riverbed leads to a reduction in the abundance of aquatic  
217 invertebrates that are prey for brown dippers (Minakawa & Gara, 2003; Moore & Schindler,  
218 2008). Since the energy value per salmon egg is higher than that per individual aquatic  
219 invertebrate (Obermeyer et al., 2006; Whitehorne, 2010), the positive effect of egg-eating may  
220 outweigh the negative effect of reduced eating of aquatic invertebrates. In fact, juvenile weight  
221 and mortality in the American dipper in salmon spawning reaches are known to be higher and  
222 lower than those in the non-spawning reaches (Obermeyer et al., 2006). Further verification is  
223 required to clarify whether these findings may be supported in the present system.

224 The abundance of aquatic invertebrates varies greatly with the season (Rundio &  
225 Lindley, 2008) and declines with flooding (Chiu et al., 2008; McMullen & Lytle, 2012).  
226 Accordingly, the decrease in aquatic invertebrate abundance leads to a decline in brown dipper  
227 abundance and survival (Chiu et al., 2008, 2013). Pink salmon, chum salmon, and masu salmon  
228 running up Japanese rivers spawn during the summer, fall and winter (Iida et al., 2021; Kovach  
229 et al., 2012; Kuzishchin et al., 2009; Quinn, 2018). Since summer and fall are typhoon seasons in

230 East Asia, salmon subsidies may compensate for the decline in aquatic invertebrates. In addition,  
231 dippers sometimes prey on salmon fry (Obermeyer et al., 2006; Ormerod, 1985; Ormerod &  
232 Tyler, 1986, 1991). Since most salmon fry mainly emerge during spring and summer (Kirillov et  
233 al., 2018; Pavlov et al., 2008; Yamada et al., 2022), salmon fry may be used as a food resource  
234 by dippers during this period. Therefore, spawning by anadromous salmonids may compensate  
235 for declines in the abundance of aquatic invertebrates during various seasons.

236 Salmon spawning abundance is disturbed by several human activities, such as dam  
237 construction and fisheries (Finney et al., 2000; Nakamura & Komiyama, 2010; Romakkaniemi et  
238 al., 2003). This study shows for the first time that the distribution patterns of small terrestrial  
239 predators are determined by the supply of salmon eggs, indicating that the disruption of natural  
240 spawning may have unexpected effects on the abundance and distribution of terrestrial salmon  
241 egg consumers. Future studies are needed to examine the effects of these anthropogenic  
242 restrictions of the salmon egg subsidy on the abundance and distribution of terrestrial consumers.

243

244

#### 245 **COMPETING INTERESTS STATEMENT**

246 None declared.

247

#### 248 **ACKNOWLEDGMENTS**

249 We thank M. Kitazawa at Hokkaido University for his valuable comments. This study was  
250 supported by JSPS KAKENHI (Grant Numbers 21H03647, 22J11475) and JST SPRING (Grant  
251 Number JPMJSP2119).

252

253 **REFERENCES**

- 254 Bates, D., Mächler, M., Bolker, B., & Walker, S. (2015). Fitting Linear Mixed-Effects Models  
255 Using lme4. *Journal of Statistical Software*, 67(1), 1–48.  
256 <https://doi.org/10.18637/jss.v067.i01>
- 257 Boulanger, J., Himmer, S., & Swan, C. (2004). Monitoring of grizzly bear population trends and  
258 demography using DNA mark–recapture methods in the Owikeno Lake area of British  
259 Columbia. *Canadian Journal of Zoology*, 82(8), 1267–1277. <https://doi.org/10.1139/z04->  
260 100
- 261 Burnham, K. P., & Anderson, D. R. (2002). *Model Selection and Multimodel Inference* (K. P.  
262 Burnham & D. R. Anderson (eds.)). Springer New York. <https://doi.org/10.1007/b97636>
- 263 Chiu, M. C., Kuo, M. H., Hong, S. Y., & Sun, Y. H. (2013). Impact of extreme flooding on the  
264 annual survival of a riparian predator, the Brown Dipper *Cinclus pallasii*. *Ibis*, 155(2), 377–  
265 383. <https://doi.org/10.1111/ibi.12035>
- 266 Chiu, M. C., Kuo, M. H., Sun, Y. H., Hong, S. Y., & Kuo, H. C. (2008). Effects of flooding on  
267 avian top-predators and their invertebrate prey in a monsoonal Taiwan stream. *Freshwater*  
268 *Biology*, 53(7), 1335–1344. <https://doi.org/10.1111/j.1365-2427.2008.01968.x>
- 269 Christie, K. S., & Reimchen, T. E. (2005). Post-reproductive Pacific salmon, *Oncorhynchus* spp.,  
270 as a major nutrient source for large aggregations of gulls, *Larus* spp. *Canadian Field-*  
271 *Naturalist*, 119(2), 202–207. <https://doi.org/10.22621/cfn.v119i2.107>
- 272 Denton, K. P., Rich, H. B., & Quinn, T. P. (2009). Diet, Movement, and Growth of Dolly Varden  
273 in Response to Sockeye Salmon Subsidies. *Transactions of the American Fisheries Society*,  
274 138(6), 1207–1219. <https://doi.org/10.1577/t09-006.1>
- 275 Dingle, H. (2014). *Migration: The Biology of Life on the Move*. Oxford University Press.  
276 <https://doi.org/10.1093/acprof:oso/9780199640386.001.0001>

- 277 Dingle, H., & Drake, V. A. (2007). What Is Migration? *BioScience*, *57*(2), 113–121.  
278 <https://doi.org/10.1641/B570206>
- 279 Eguchi, K. (1990). The choice of foraging methods of the Brown Dipper, *Cinclus pallasii* (Aves:  
280 Cinclidae). *Journal of Ethology*, *8*(2), 121–127. <https://doi.org/10.1007/BF02350282>
- 281 Field, R. D., & Reynolds, J. D. (2013). Ecological links between salmon, large carnivore  
282 predation, and scavenging birds. *Journal of Avian Biology*, *44*(1), 009–016.  
283 <https://doi.org/10.1111/j.1600-048X.2012.05601.x>
- 284 Finney, B. P., Gregory-Eaves, I., Sweetman, J., Douglas, M. S. V., & Smol, J. P. (2000). Impacts  
285 of Climatic Change and Fishing on Pacific Salmon Abundance Over the Past 300 Years.  
286 *Science*, *290*(5492), 795–799. <https://doi.org/10.1126/science.290.5492.795>
- 287 Fretwell, S. D., & Lucas, H. L. (1969). On territorial behavior and other factors influencing  
288 habitat distribution in birds. *Acta Biotheoretica*, *19*(1), 16–36.  
289 <https://doi.org/10.1007/BF01601953>
- 290 Gende, S. M., Edwards, R. T., Willson, M. F., & Wipfli, M. S. (2002). Pacific salmon in aquatic  
291 and terrestrial ecosystems. *BioScience*, *52*(10), 917–928. [https://doi.org/10.1641/0006-3568\(2002\)052\[0917:PSIAAT\]2.0.CO;2](https://doi.org/10.1641/0006-3568(2002)052[0917:PSIAAT]2.0.CO;2)
- 292
- 293 Goodge, W. R. (1959). Locomotion and Other Behavior of the Dipper. *The Condor*, *61*(1), 4–17.  
294 <https://doi.org/10.2307/1365341>
- 295 Hocking, M. D., Dulvy, N. K., Reynolds, J. D., Ring, R. A., & Reimchen, T. E. (2013). Salmon  
296 subsidize an escape from a size spectrum. *Proceedings of the Royal Society B: Biological*  
297 *Sciences*, *280*(1753). <https://doi.org/10.1098/rspb.2012.2433>
- 298 Hocking, M. D., & Reynolds, J. D. (2011). Impacts of salmon on riparian plant diversity.  
299 *Science*, *331*(6024), 1609–1612. <https://doi.org/10.1126/science.1201079>
- 300 Hong, S. Y., Wang, T. W., Sun, Y. H., Chiu, M. C., Kuo, M. H., & Chen, C. C. (2019). Stream

- 301 type influences food abundance and reproductive performance of a stream specialist: the  
302 Brown Dipper (*Cinclus pallasii*). *Journal of Ornithology*, 160(1), 105–115.  
303 <https://doi.org/10.1007/s10336-018-1604-6>
- 304 Iida, M., Yagi, Y., & Iseki, T. (2021). Occurrence of wild chum salmon fry in the surf zone, and  
305 spawning and emergence timing in the adjacent nonstocked river in Niigata Prefecture,  
306 Japan. *Fisheries Science*, 87(4), 549–557. <https://doi.org/10.1007/s12562-021-01535-4>
- 307 IUCN. (2005). *World Heritage Nomination – IUCN Technical Evaluation, Shiretoko (Japan)*.  
308 <https://whc.unesco.org/document/152000>
- 309 Johnston, R., Jones, K., & Manley, D. (2018). Confounding and collinearity in regression  
310 analysis: a cautionary tale and an alternative procedure, illustrated by studies of British  
311 voting behaviour. *Quality & Quantity*, 52(4), 1957–1976. [https://doi.org/10.1007/s11135-](https://doi.org/10.1007/s11135-017-0584-6)  
312 [017-0584-6](https://doi.org/10.1007/s11135-017-0584-6)
- 313 Kawaguchi, Y., Taniguchi, Y., & Nakano, S. (2003). Terrestrial invertebrate inputs determine  
314 the local abundance of stream fishes in a forested stream. *Ecology*, 84(3), 701–708.  
315 [https://doi.org/10.1890/0012-9658\(2003\)084\[0701:TIIDTL\]2.0.CO;2](https://doi.org/10.1890/0012-9658(2003)084[0701:TIIDTL]2.0.CO;2)
- 316 Kirillov, P. I., Kirillova, E. A., & Pavlov, D. S. (2018). Patterns of Downstream Migration of  
317 Pink Salmon *Oncorhynchus gorbusha* in the Malaya Khusi River (Sakhalin Oblast).  
318 *Journal of Ichthyology*, 58(6), 889–901. <https://doi.org/10.1134/S0032945218060085>
- 319 Koshino, Y., Kudo, H., & Kaeriyama, M. (2013). Stable isotope evidence indicates the  
320 incorporation into Japanese catchments of marine-derived nutrients transported by  
321 spawning Pacific Salmon. *Freshwater Biology*, 58(9), 1864–1877.  
322 <https://doi.org/10.1111/fwb.12175>
- 323 Kovach, R. P., Gharrett, A. J., & Tallmon, D. A. (2012). Genetic change for earlier migration  
324 timing in a pink salmon population. *Proceedings of the Royal Society B: Biological*

- 325 *Sciences*, 279(1743), 3870–3878. <https://doi.org/10.1098/rspb.2012.1158>
- 326 Kuzishchin, K. V., Malyutina, A. M., Gruzdeva, M. A., Savvaitova, K. A., & Pavlov, D. S.  
327 (2009). Reproduction ecology of masu salmon *Oncorhynchus masou* in the Kol basin  
328 (Western Kamchatka). *Journal of Ichthyology*, 49(6), 441–453.  
329 <https://doi.org/10.1134/S0032945209060034>
- 330 Levi, T., Darimont, C. T., MacDuffee, M., Mangel, M., Paquet, P., & Wilmers, C. C. (2012).  
331 Using grizzly bears to assess harvest-ecosystem tradeoffs in salmon fisheries. *PLoS*  
332 *Biology*, 10(4). <https://doi.org/10.1371/journal.pbio.1001303>
- 333 McMullen, L. E., & Lytle, D. A. (2012). Quantifying invertebrate resistance to floods: a global-  
334 scale meta-analysis. *Ecological Applications*, 22(8), 2164–2175. [https://doi.org/10.1890/11-](https://doi.org/10.1890/11-1650.1)  
335 1650.1
- 336 Minakawa, N., & Gara, R. I. (2003). Effects of Chum Salmon Redd Excavation on Benthic  
337 Communities in a Stream in the Pacific Northwest. *Transactions of the American Fisheries*  
338 *Society*, 132(3), 598–604. [https://doi.org/10.1577/1548-](https://doi.org/10.1577/1548-8659(2003)132<0598:eocsre>2.0.co;2)  
339 8659(2003)132<0598:eocsre>2.0.co;2
- 340 Moore, J. W., & Schindler, D. E. (2008). Biotic disturbance and benthic community dynamics in  
341 salmon-bearing streams. *Journal of Animal Ecology*, 77(2), 275–284.  
342 <https://doi.org/10.1111/j.1365-2656.2007.01336.x>
- 343 Morita, K. (2021). Reverse migration of adult pink salmon (*Oncorhynchus gorbuscha*) to the sea  
344 after their return to fresh water. *Environmental Biology of Fishes*, 0123456789.  
345 <https://doi.org/10.1007/s10641-021-01139-y>
- 346 Munro, J. A. (1941). Studies of waterfowl in British Columbia: Greater scaup duck, lesser scaup  
347 duck. *Canadian Journal of Research*, 19(4), 113–138. <https://doi.org/10.1139/cjr41d-010>
- 348 Murata, S. (1900). First Group of Hokkaido Birds (2) (in Japanese). *Zoological Magazine*,

- 349        12(144), 365–369.
- 350 Nakamura, F., & Komiyama, E. (2010). A challenge to dam improvement for the protection of  
351 both salmon and human livelihood in Shiretoko, Japan’s third Natural Heritage Site.  
352        *Landscape and Ecological Engineering*, 6(1), 143–152. [https://doi.org/10.1007/s11355-](https://doi.org/10.1007/s11355-009-0083-6)  
353        009-0083-6
- 354 Nakano, S., & Murakami, M. (2001). Reciprocal subsidies: Dynamic interdependence between  
355 terrestrial and aquatic food webs. *Proceedings of the National Academy of Sciences*, 98(1),  
356        166–170. <https://doi.org/10.1073/pnas.98.1.166>
- 357 Nilsson, A. L. K., L’Abée-Lund, J. H., Vøllestad, L. A., Jerstad, K., Larsen, B. M., Røstad, O.  
358 W., Saltveit, S. J., Skaugen, T., Stenseth, N. C., & Walseng, B. (2018). The potential  
359 influence of Atlantic salmon *Salmo salar* and brown trout *Salmo trutta* on density and  
360 breeding of the white-throated dipper *Cinclus cinclus*. *Ecology and Evolution*, 8(8), 4065–  
361        4073. <https://doi.org/10.1002/ece3.3958>
- 362 Obermeyer, K. E., Hodgson, A., & Willson, M. F. (1999). American Dipper, *Cinclus mexicanus*,  
363 foraging on Pacific salmon, *Oncorhynchus* sp., eggs. *Canadian Field-Naturalist*, 113(2),  
364        288–290.
- 365 Obermeyer, K. E., White, K. S., & Willson, M. F. (2006). Influence of salmon on the nesting  
366 ecology of American dippers in southeastern Alaska. *Northwest Science*, 80(1), 26–33.
- 367 Ormerod, S. J. (1985). The diet of breeding Dippers *Cinclus cinclus* and their nestlings in the  
368 catchment of the River Wye, mid-Wales: a preliminary study by faecal analysis. *Ibis*,  
369        127(3), 316–331. <https://doi.org/10.1111/j.1474-919X.1985.tb05073.x>
- 370 Ormerod, S. J., & Tyler, S. J. (1986). The diet of dippers *Cinclus cinclus* wintering in the  
371 catchment of the River Wye, Wales. *Bird Study*, 33(1), 36–45.  
372        <https://doi.org/10.1080/00063658609476888>



- 373 Ormerod, S. J., & Tyler, S. J. (1991). Exploitation of prey by a river bird, the dipper *Cinclus*  
374 *cinclus* (L.), along acidic and circumneutral streams in upland Wales. *Freshwater Biology*,  
375 25(1), 105–116. <https://doi.org/10.1111/j.1365-2427.1991.tb00477.x>
- 376 Ortlepp, J., & Mürle, U. (2003). Effects of experimental flooding on brown trout (*Salmo trutta*  
377 *fario* L.): The River Spöl, Swiss National Park. *Aquatic Sciences*, 65(3), 232–238.  
378 <https://doi.org/10.1007/s00027-003-0666-5>
- 379 Pavlov, D. S., Kirillova, E. A., & Kirillov, P. I. (2008). Patterns and some mechanisms of  
380 downstream migration of juvenile salmonids (with reference to the Utkholok and  
381 Kalkaveyem rivers in Northwestern Kamchatka). *Journal of Ichthyology*, 48(11), 937–980.  
382 <https://doi.org/10.1134/S0032945208110027>
- 383 Pedersen, M. L., Kristensen, E. A., Kronvang, B., & Thodsen, H. (2009). Ecological effects of  
384 re-introduction of salmonid spawning gravel in lowland Danish streams. *River Research*  
385 *and Applications*, 25(5), 626–638. <https://doi.org/10.1002/rra.1232>
- 386 Polis, G. A., Anderson, W. B., & Holt, R. D. (1997). Toward an integration of landscape and  
387 food web ecology: The dynamics of spatially subsidized food webs. *Annual Review of*  
388 *Ecology and Systematics*, 28, 289–316. <https://doi.org/10.1146/annurev.ecolsys.28.1.289>
- 389 Quinn, T. P. (2018). *The Behavior and Ecology of Pacific Salmon and Trout* (Second Edi).  
390 University of Washington Press.
- 391 R Core Team. (2022). *R: A Language and Environment for Statistical Computing*. [https://www.r-](https://www.r-project.org/)  
392 [project.org/](https://www.r-project.org/)
- 393 Reimchen, T. E. (2017). Diverse ecological pathways of salmon nutrients through an intact  
394 marine-terrestrial interface. *Canadian Field-Naturalist*, 131(4), 350–368.  
395 <https://doi.org/10.22621/cfn.v131i4.1965>
- 396 Romakkaniemi, A., Perä, I., Karlsson, L., Jutila, E., Carlsson, U., & Pakarinen, T. (2003).

- 397 Development of wild Atlantic salmon stocks in the rivers of the northern Baltic Sea in  
398 response to management measures. *ICES Journal of Marine Science*, 60(2), 329–342.  
399 [https://doi.org/10.1016/S1054-3139\(03\)00020-1](https://doi.org/10.1016/S1054-3139(03)00020-1)
- 400 Rundio, D. E., & Lindley, S. T. (2008). Seasonal Patterns of Terrestrial and Aquatic Prey  
401 Abundance and Use by *Oncorhynchus mykiss* in a California Coastal Basin with a  
402 Mediterranean Climate. *Transactions of the American Fisheries Society*, 137(2), 467–480.  
403 <https://doi.org/10.1577/t07-076.1>
- 404 Schindler, D. E., Scheuerell, M. D., Moore, J. W., Gende, S. M., Francis, T. B., & Palen, W. J.  
405 (2003). Pacific Salmon and the Ecology of Coastal Ecosystems. *Frontiers in Ecology and*  
406 *the Environment*, 1(1), 31. <https://doi.org/10.2307/3867962>
- 407 Spiller, D. A., Piovia-Scott, J., Wright, A. N., Yang, L. H., Takimoto, G., Schoener, T. W., &  
408 Iwata, T. (2010). Marine subsidies have multiple effects on coastal food webs. *Ecology*,  
409 91(5), 1424–1434. <https://doi.org/10.1890/09-0715.1>
- 410 Takahashi, G., Kuwahara, T., & Yamanaka, M. (2005). Dams in the Shiretoko Peninsula: Issues  
411 in river management and environmental conservation (in Japanese with English abstract).  
412 *Japanese Journal of Conservation Ecology*, 10(2), 139–149.  
413 [https://doi.org/https://doi.org/10.18960/hozen.10.2\\_139](https://doi.org/https://doi.org/10.18960/hozen.10.2_139)
- 414 Taylor, A. J., & O'Halloran, J. (1997). The diet of the Dipper *Cinclus cinclus* as represented by  
415 faecal and regurgitate pellets: A comparison. *Bird Study*, 44(3), 338–347.  
416 <https://doi.org/10.1080/00063659709461069>
- 417 Taylor, A. J., & O'Halloran, J. (2001). Diet of dippers *cinclus cinclus* during an early winter  
418 spate and the possible implications for dipper populations subjected to climate change. *Bird*  
419 *Study*, 48(2), 173–179. <https://doi.org/10.1080/00063650109461215>
- 420 Terui, A., Negishi, J. N., Watanabe, N., & Nakamura, F. (2018). Stream Resource Gradients

- 421 Drive Consumption Rates of Supplemental Prey in the Adjacent Riparian Zone.  
422 *Ecosystems*, 21(4), 772–781. <https://doi.org/10.1007/s10021-017-0183-3>
- 423 Thedinga, J. F., Wertheimer, A. C., Heintz, R. A., Maselko, J. M., & Rice, S. D. (2000). Effect of  
424 stock, coded-wire tagging, and transplant on straying of pink salmon (*Oncorhynchus*  
425 *gorbuscha*) in southeastern Alaska. *Canadian Journal of Fisheries and Aquatic Sciences*,  
426 57(10), 2076–2085. <https://doi.org/10.1139/f00-163>
- 427 Tonra, C. M., Sager-Fradkin, K., & Marra, P. P. (2016). Barriers to salmon migration impact  
428 body condition, offspring size, and life history variation in an avian consumer. *Ecography*,  
429 39(11), 1056–1065. <https://doi.org/10.1111/ecog.02014>
- 430 Walters, K. E., Reynolds, J. D., & Ydenberg, R. C. (2021). Ideal free eagles: Bald Eagle  
431 (*Haliaeetus leucocephalus*) distribution in relation to Pacific salmon (*Oncorhynchus* spp.)  
432 availability on four spawning rivers. *Canadian Journal of Zoology*, 99(9), 792–800.  
433 <https://doi.org/10.1139/cjz-2020-0191>
- 434 Whitehorne, I. (2010). Wintering behavior, physiology and site fidelity in a partial migrant, the  
435 American Dipper (*Cinclus mexicanus*). *Waterbirds*, 33(4), 461–470.  
436 <https://doi.org/10.1675/063.033.0405>
- 437 Willson, M. F., & Halupka, K. C. (1995). Anadromous Fish as Keystone Species in Vertebrate  
438 Communities. *Conservation Biology*, 9(3), 489–497. <https://doi.org/10.1046/j.1523-1739.1995.09030489.x>
- 440 Wipfli, M. S., Hudson, J., & Caouette, J. (1998). Influence of salmon carcasses on stream  
441 productivity: Response of biofilm and benthic macroinvertebrates in southeastern Alaska,  
442 U.S.A. *Canadian Journal of Fisheries and Aquatic Sciences*, 55(6), 1503–1511.  
443 <https://doi.org/10.1139/f98-031>
- 444 Wipfli, M. S., Hudson, J. P., Chaloner, D. T., & Caouette, J. P. (1999). Influence of salmon

445 spawner densities on stream productivity in Southeast Alaska. *Canadian Journal of*  
446 *Fisheries and Aquatic Sciences*, 56(9), 1600–1611. <https://doi.org/10.1139/f99-087>  
447 Yamada, T., Urabe, H., & Nakamura, F. (2022). Diel migration pattern of pink salmon fry in  
448 small streams. *Journal of Fish Biology*, 100(4), 1088–1092.  
449 <https://doi.org/10.1111/jfb.15007>  
450

451 **TABLES**

452

453 **Table 1.** Results of model selection for each response variable (i.e., salmon egg ratio in brown  
454 dipper diets or brown dipper abundance). AIC corresponds to Akaike information criteria;  $\Delta$ AIC  
455 is the difference between the AIC of that model and that of the model with the lowest AIC. Bold  
456 indicates the best model. Redds, number of spawning redds; Time, survey start time; Age, age  
457 category.

458

| <b>Model</b>     | <b>logLik</b> | <b>AIC</b>    | <b><math>\Delta</math>AIC</b> | <b>Marginal <math>R^2</math></b> | <b>Conditional <math>R^2</math></b> |
|------------------|---------------|---------------|-------------------------------|----------------------------------|-------------------------------------|
| Salmon egg ratio |               |               |                               |                                  |                                     |
| <b>Redds</b>     | <b>-45.98</b> | <b>99.97</b>  | <b>0.00</b>                   | <b>0.319</b>                     | <b>0.494</b>                        |
| Redds + Age      | -45.71        | 101.42        | 1.45                          | 0.324                            | 0.483                               |
| Null             | -48.91        | 103.82        | 3.85                          | –                                | –                                   |
| Age              | -48.59        | 105.17        | 5.20                          | 0.090                            | 0.313                               |
| Dipper abundance |               |               |                               |                                  |                                     |
| <b>Redds</b>     | <b>-63.11</b> | <b>132.23</b> | <b>0.00</b>                   | <b>0.396</b>                     | <b>0.528</b>                        |
| Redds + Time     | -62.66        | 133.32        | 1.09                          | 0.410                            | 0.571                               |
| Time             | -71.60        | 149.20        | 16.97                         | 0.188                            | 0.311                               |
| Null             | -72.85        | 149.71        | 17.48                         | –                                | –                                   |

459

460

461 **Table 2.** Results of GLMMs testing effects of number of redds on the salmon egg ratio in brown  
462 dipper diets and brown dipper abundance, and the presence/absence of salmon (below/above  
463 dam) on brown dipper abundance during peak spawning period.

464

| <b>Response variable</b>                        | <b>Fixed effect</b> | <b>Estimate</b> | <b>Std. Error</b> | <b>z value</b> |
|-------------------------------------------------|---------------------|-----------------|-------------------|----------------|
| Salmon egg ratio<br>in dipper diets             | Intercept           | -2.07           | 1.36              | -1.53          |
|                                                 | Number of redds     | 0.05            | 0.02              | 2.70           |
| Dipper abundance                                | Intercept           | -6.56           | 0.20              | -32.47         |
|                                                 | Number of redds     | 0.02            | 0.00              | 4.40           |
| Dipper abundance during<br>peak spawning period | Intercept           | -8.32           | 0.72              | -11.52         |
|                                                 | Section -Below dam  | 2.63            | 0.75              | 3.50           |

465

466

467

468 **FIGURE CAPTIONS**

469

470 **Figure 1.** The brown dipper *Cinclus pallasii*. Photo by Yuya Eguchi.

471 **Figure 2.** Map of the study area located on the Shiretoko Peninsula. The blue lines indicate the  
472 streams surveyed.

473 **Figure 3.** (a) Composition of brown dipper diets during the salmon pre-spawning and spawning  
474 periods. AI: aquatic invertebrate, TI: terrestrial invertebrate, A: algae, and SE: salmon egg. (b)  
475 Mean predicted marginal effects of the number of spawning redds on the salmon egg ratio in  
476 brown dipper diets. The shaded area indicates 95% CI.

477 **Figure 4.** Observed brown dipper abundance and number of spawning redds in relation to  
478 surveyed date in each stream.

479 **Figure 5.** Mean predicted marginal effects of the number of spawning redds on brown dipper  
480 abundance. The 95% CI is denoted by shaded area.

481 **Figure 6.** Mean predicted marginal effects of salmon occurrence on brown dipper abundance  
482 during the peak spawning season. The translucent boxes indicate 95% CIs.

483

484 **FIGURES**

485

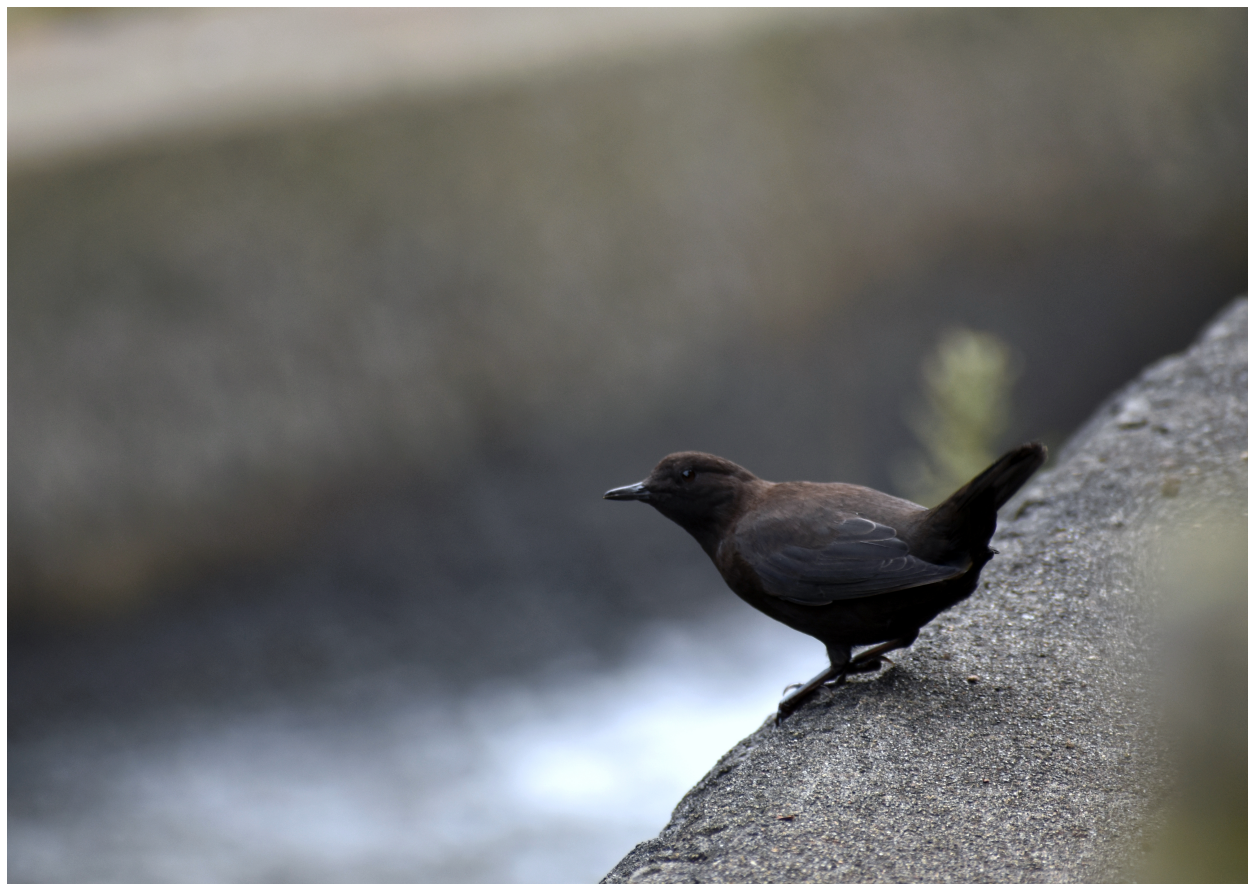

486

487 **Figure 1.**

488



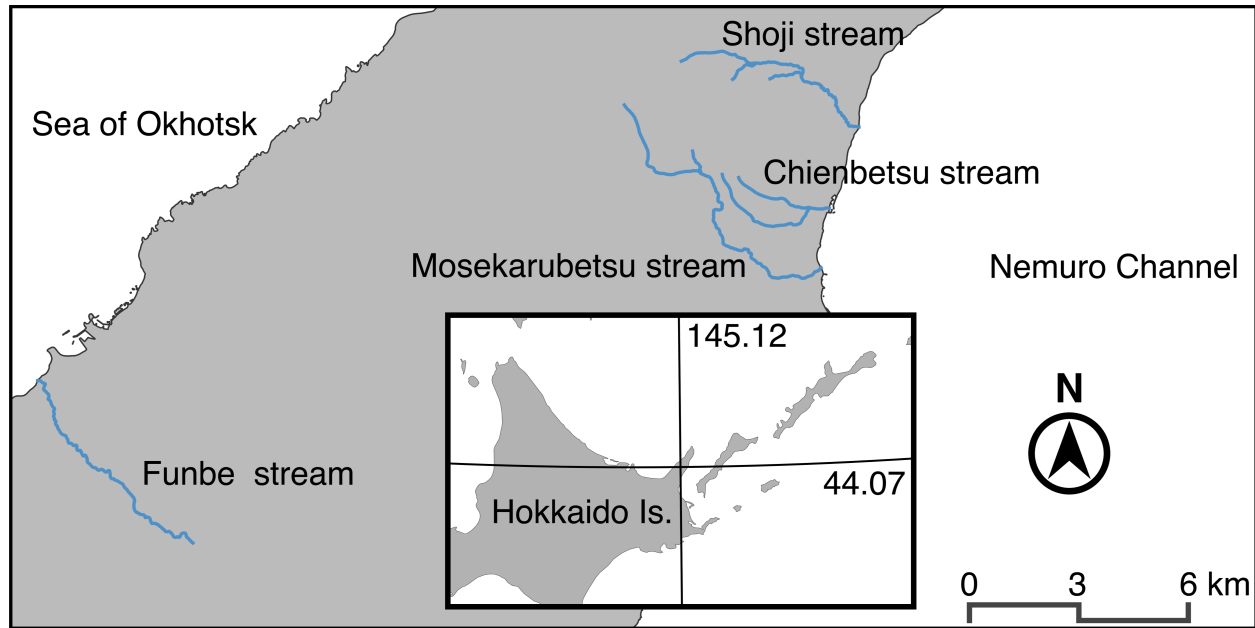

489

490 **Figure 2.**

491

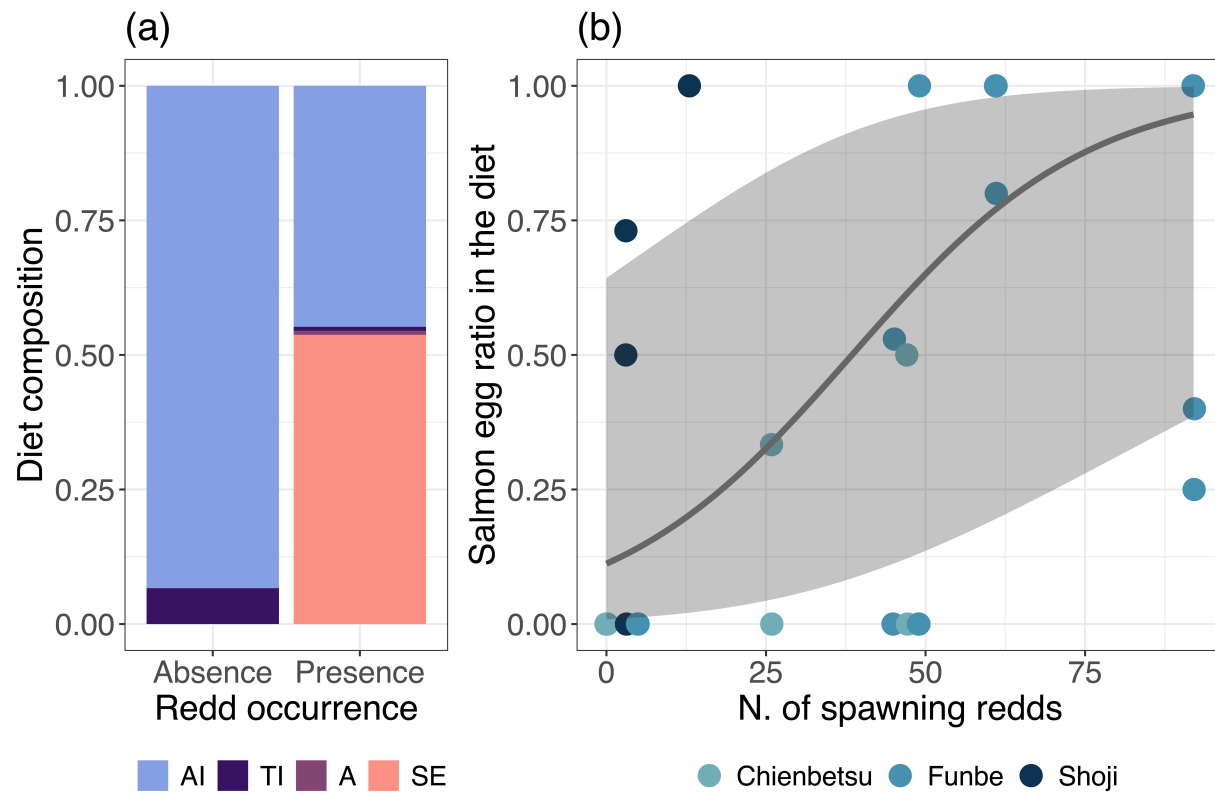

492

493 **Figure 3.**

494

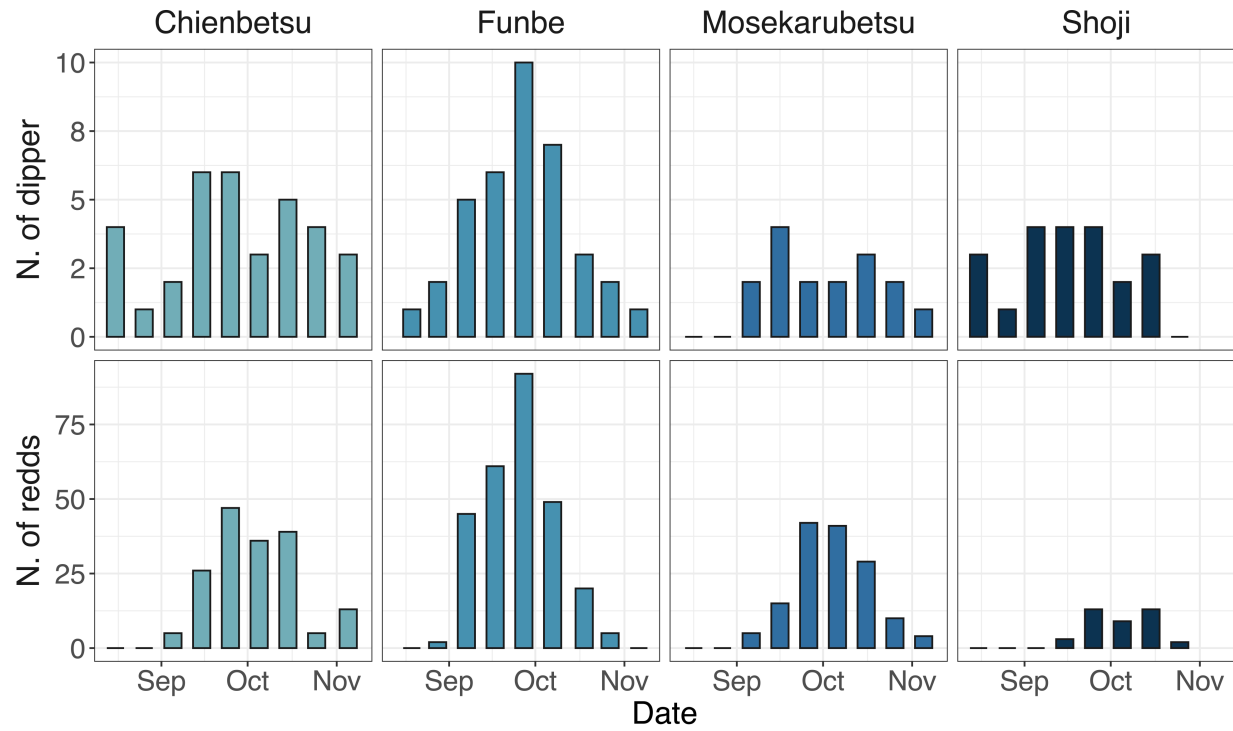

495

496 **Figure 4.**

497

498

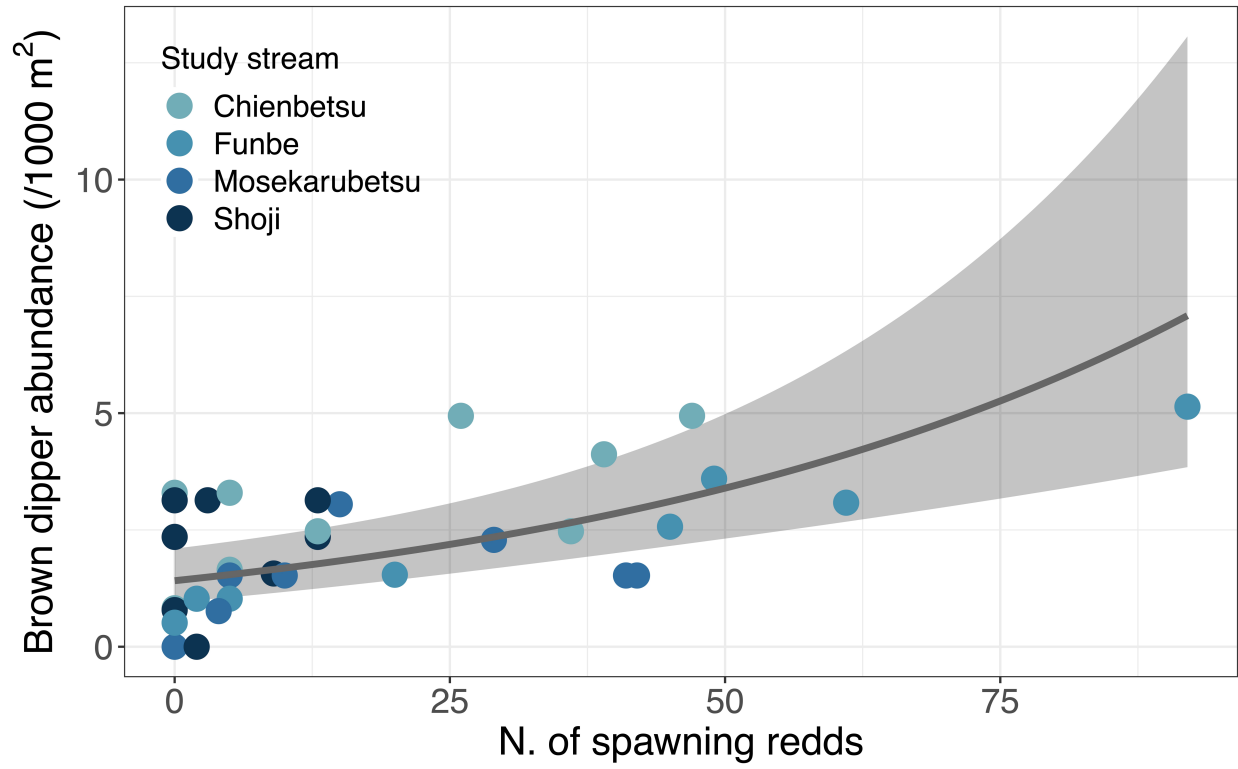

499

500 **Figure 5.**

501

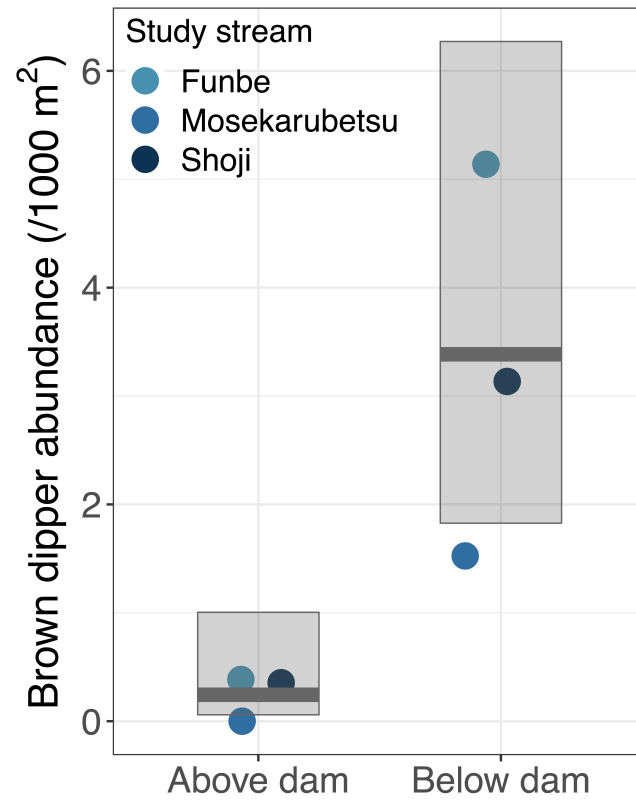

502

503 **Figure 6.**

504
